# Supplementary material for: A Case Report on Hepatic Extramedullary Hematopoiesis as the Manifestation of Progression to Secondary Myelofibrosis in a Patient with Essential Thrombocytopenia
Source: MDPI journal article supplement (doi:10.3390/hematolrep14040040), 2022-09-21
Supplement: s1 [file s1]

**Supplementary Materials:**

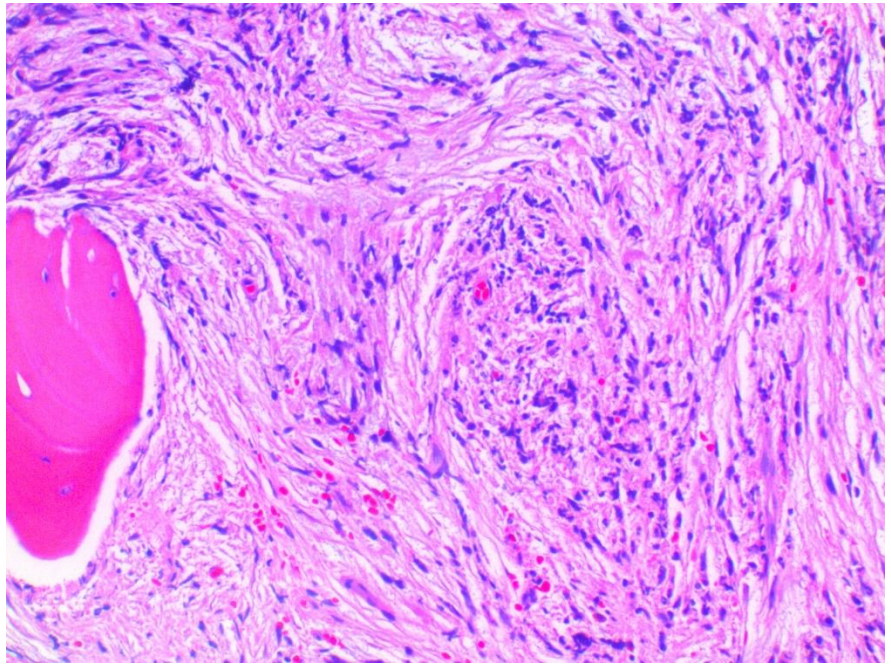

**Figure S1.** H&E bone marrow biopsy. Bone marrow shows diffuse fibrosis replacing the marrow's hematopoietic elements and mildly increased megakaryocytes (hematoxylin and eosin, x400).

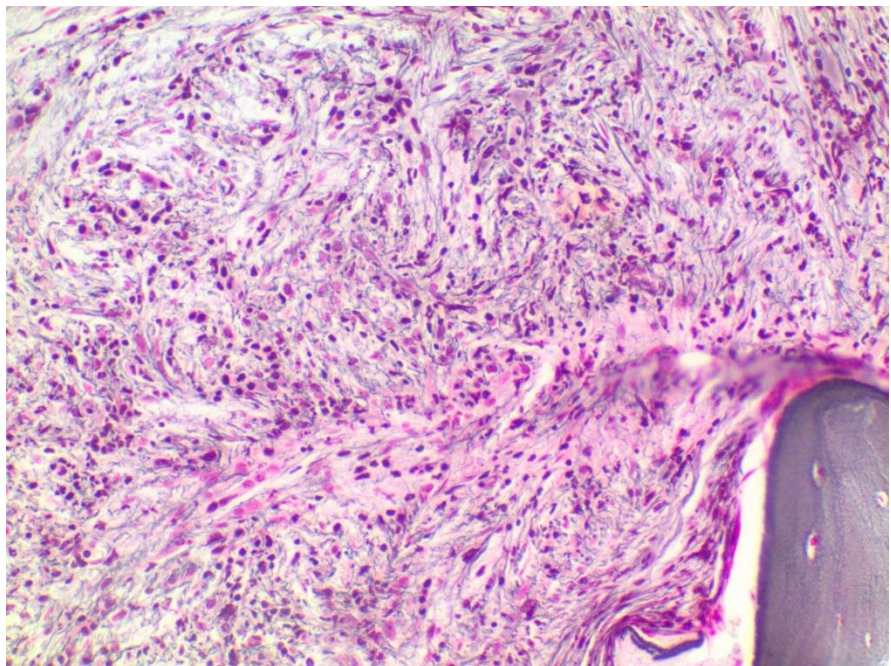

**Figure S2.** Reticulin bone marrow biopsy. Reticulin staining shows a diffuse and dense increase in the reticulin fibers and coarse collagen fibers (reticulin stain, x400).

**Table S3. Patient's Enzyme Results:** Grade 3 markedly and diffusely increased collagen deposits. Trichome stain, 20x.

| Date       | Alkaline Phosphatase | AST | ALT | Total Bilirubin |
|------------|----------------------|-----|-----|-----------------|
| 8/30/2019  | 54                   | 24  | 24  | 1.2             |
| 10/14/2019 | 59                   | 23  | 23  | 0.9             |
| 6/8/2020   | 58                   | 20  | 19  | 0.8             |
| 10/29/2020 | 89                   | 31  | 21  | 1.2             |
| 11/5/2020  | 93                   | 28  | 21  | 0.9             |
| 11/13/2020 | 100                  | 33  | 32  | 1.1             |
| 12/14/2020 | 81                   | 25  | 19  | 1               |
| 1/20/2021  | 64                   | 23  | 13  | 1.1             |
| 3/10/2021  | 71                   | 21  | 12  | 1.4             |
| 4/7/2021   | 80                   | 26  | 15  | 1.8             |
| 5/14/2021  | 116                  | 27  | 13  | 2               |
| 6/10/2021  | 178                  | 34  | 23  | 1.7             |
| 7/28/2021  | 361                  | 62  | 51  | 2.8             |
| 8/3/2021   | 487                  | 181 | 95  | 3.5             |
| 8/5/2021   | 524                  | 48  | 49  | 3.1             |
| 8/6/2021   | 357                  | 39  | 37  | 3               |
| 8/11/2021  | 395                  | 57  | 39  | 2.8             |
| 8/19/2021  | 402                  | 69  | 44  | 2.2             |
| 8/24/2021  | 330                  | 51  | 42  | 2               |
| 9/2/2021   | 298                  | 110 | 87  | 1.5             |
| 9/8/2021   | 363                  | 89  | 105 | 1.3             |
| 9/23/2021  | 309                  | 75  | 71  | 1.7             |
| 10/7/2021  | 283                  | 50  | 58  | 1.8             |
| 10/16/2021 | 463                  | 76  | 81  | 2.1             |
| 10/21/2021 | 497                  | 70  | 74  | 1.5             |
| 10/28/2021 | 343                  | 38  | 32  | 1.3             |
| 11/1/2021  | 226                  | 49  | 35  | 1.4             |
| 11/3/2021  | 245                  | 53  | 37  | 1.6             |
| 11/10/2021 |                      | 54  | 41  | 1.4             |
